# Supplementary material
Source: publisher site journal article supplement (https://www.dovepress.com/article/370192)
Supplement: Supplementary file 1 [file get_supplementary_file.php]

**Supplementary materials**


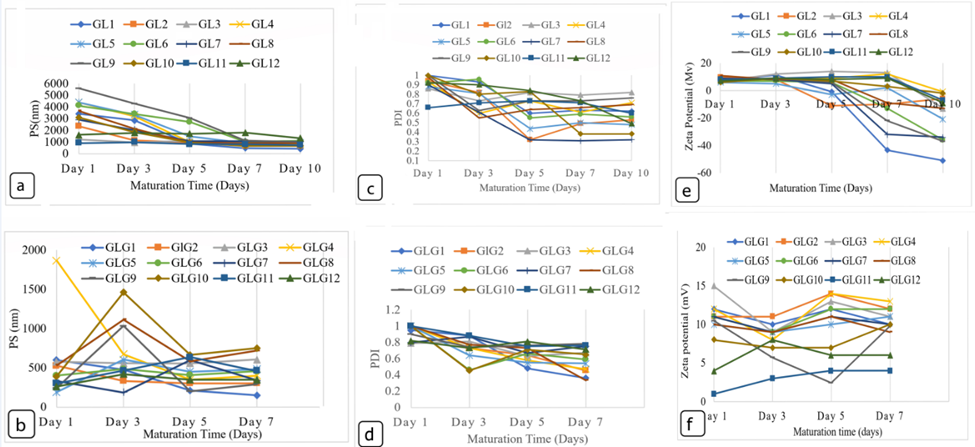


**Figure S1:** Tracking the particle size (PS), polydispersity index (PDI) and Zeta potential (ZP) of the prepared formulations over a period of 7 to 10-days: a) PS of the glycerol free formulations; GL1 through GL12, b) PS of the glycerol containing formulations; GLG1 through GLG12, c) PDI of GL1 through GL12, d) PDI of GLG1 through GLG12, e) ZP of GL1 through GL12 and f) ZP of GLG1 through GLG12.


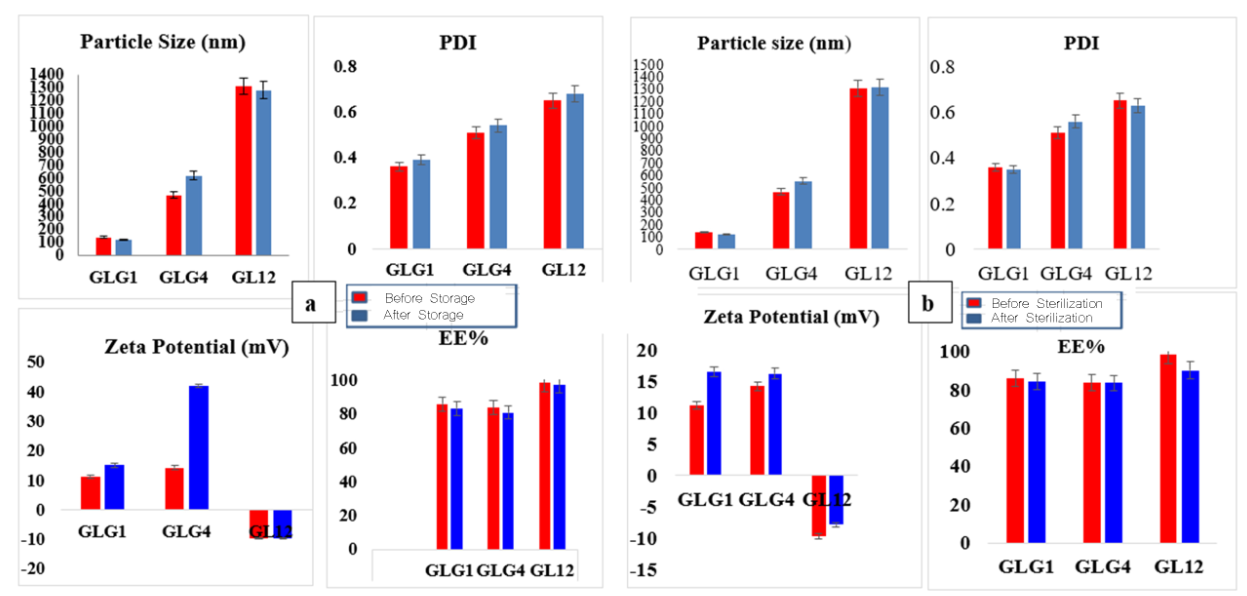


**Figure S2:** Characterization (PS, PDI, ZP and EE%) of the selected formulations for further investigation: a) before and after storage for 3 months and b) before and after sterilization by gamma irradiation.
